# Supplementary material for: Dimensions of sustainability for a health communication intervention in African American churches: a multi-methods study
Source: PubMed Central journal article supplement (PMC5371253; doi:10.1186/s13012-017-0576-x), 2017-03-28
Supplement: 13012_2017_576_MOESM4_ESM.pdf [file 13012_2017_576_MOESM4_ESM.pdf]

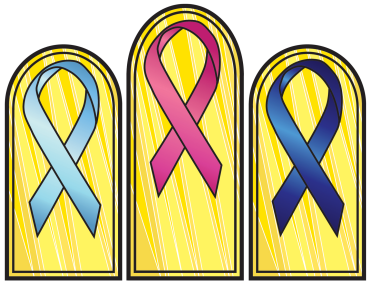

# Project HEAL

HEAL

*Health through Early Awareness and Learning*

---

**First Name:** \_\_\_\_\_

**Last Name:** \_\_\_\_\_

**In this survey we are going to ask you some questions about cancer and testing for it. You may or may not have any knowledge about these things, and this is ok. Even if you have not heard of cancer or ways of testing for it, this is important for us to know. You can mark a 'not sure' response to any question if you just don't know the answer.**

**This survey is the last survey for Project HEAL. We will share our findings back to you so that you know what happened with the project.**

**We thank you for your patience with this important part of the project.**

**Please read each question carefully.**

**Feel free to ask the members of the HEAL staff to assist you if you need any help or have any questions.**

**Let's begin!**

**Thank you for taking part in the HEAL project. Your answers on this survey will help to see if the project is making a difference in your community. Please give your honest and best answers.**

For each question, please **place an x in the box** that most closely reflects your attitude or feeling. **Other** questions will ask you to **write in** your answer. There are no right or wrong answers - we are interested in your honest opinions.

Have you shared the knowledge from Project HEAL workshops with any of the below? (Mark all that apply)

- Family members
- Friends
- Co-workers
- Congregation members
- None
- Other: \_\_\_\_\_

**The next few questions are about the HEAL Newsletters:**

Did you receive newsletters from Project HEAL:

- Yes
- No
- Not sure

**If no or not sure please skip the next question.**

How many newsletters do you remember getting?

- 1
- 2
- 3
- 4 or more
- Don't remember

**The next few questions are about the HEAL text messages:**

Did you receive text messages on your phone from the Project HEAL:

- Yes
- No
- Not sure
- I do not or cannot receive text messages on my phone

**If no, not sure, or do not/cannot receive please skip to page 5.**

About how often do you remember getting text messages?

- Less than once per month
- Once per month
- Twice per month
- More than twice per month
- Don't remember

| How much do you agree or disagree with the following statements? (please check ONE) | Strongly Disagree | Disagree | Agree | Strongly Agree | Did not get |
|-------------------------------------------------------------------------------------|-------------------|----------|-------|----------------|-------------|
| I <b>enjoyed</b> getting text messages about the program.                           |                   |          |       |                |             |
| The HEAL text messages kept me <b>engaged</b> in the program.                       |                   |          |       |                |             |
| The HEAL text messages kept me <b>informed</b> about the program                    |                   |          |       |                |             |

**About how long has it been since you last visited a doctor for a routine checkup? A routine checkup is a general physical exam, not an exam for a specific injury, illness, or condition.**

- \_\_\_\_\_ Within the past year (anytime less than 12 months ago)
- \_\_\_\_\_ Within the past 2 years (1 year but less than 2 years ago)
- \_\_\_\_\_ Within the past 5 years (2 years but less than 5 years ago)
- \_\_\_\_\_ 5 or more years ago
- \_\_\_\_\_ Don't know /Not sure
- \_\_\_\_\_ Never

**These next few questions are about colorectal cancer:**

| Do you agree or disagree with the following statements?                             | Disagree | Agree | Not Sure |
|-------------------------------------------------------------------------------------|----------|-------|----------|
| Colorectal cancer is cancer of the colon or rectum.                                 |          |       |          |
| Colorectal cancer affects only older White men.                                     |          |       |          |
| Risk of colorectal cancer becomes greater as a person gets older.                   |          |       |          |
| Both men and women are at risk for colorectal cancer.                               |          |       |          |
| Colorectal cancer begins as a growth in the colon or rectum.                        |          |       |          |
| Bleeding is a symptom to report to your doctor.                                     |          |       |          |
| Colorectal cancer screening is not necessary if there are no symptoms.              |          |       |          |
| Finding colorectal cancer early will save your life.                                |          |       |          |
| The treatment for colorectal cancer may not be as bad if the cancer is found early. |          |       |          |

**We would like to ask you about a test called Fecal Occult Blood test or FOBT:**

This test is done to check for colon cancer. It is done at home, using a set of 3 cards, to check if your stools have blood. To do this test, you need to take some of the stool and smear it on the card. Then, you return the card to the doctor's office to be tested.

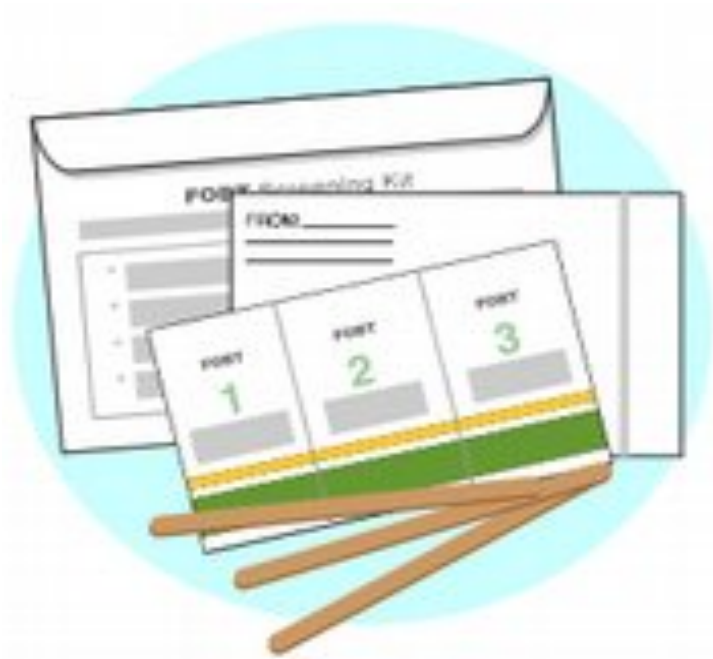

Have you ever heard of this test?

\_\_\_ Yes \_\_\_ No \_\_\_ Don't know/Not sure

If yes, please go to the next page (page 7) of the survey.

If no or don't know/not sure, please skip to page 8 of the survey.

*[If you have never heard of a Fecal Occult Blood test (stool test), please SKIP to page 8 of the survey.]*

**Have you ever used a home kit to do this test?**    \_\_\_\_\_ Yes    \_\_\_\_\_ No    \_\_\_\_\_ Don't know/Not Sure

**How long has it been since you did your last blood stool test using a home kit?**

- \_\_\_\_\_ In the past year (12 months ago or less)
- \_\_\_\_\_ Between 1 and 2 years ago (more than 12 months but less than 24 months ago)
- \_\_\_\_\_ More than 2 years ago (More than 24 months ago)
- \_\_\_\_\_ Never
- \_\_\_\_\_ Don't know /Not sure

**Has a health care provider recommended that you do a stool blood test this year, to check your bowel for cancer?**

- \_\_\_\_\_ Yes                    \_\_\_\_\_ No                    \_\_\_\_\_ Don't know/Don't remember

**We would like to ask you about a test called Sigmoidoscopy:**

Sigmoidoscopy is an exam in which a tube is inserted in the rectum to examine the bowel for signs of cancer or other health problems. During the sigmoidoscopy, **you are awake**.

## Sigmoidoscopy

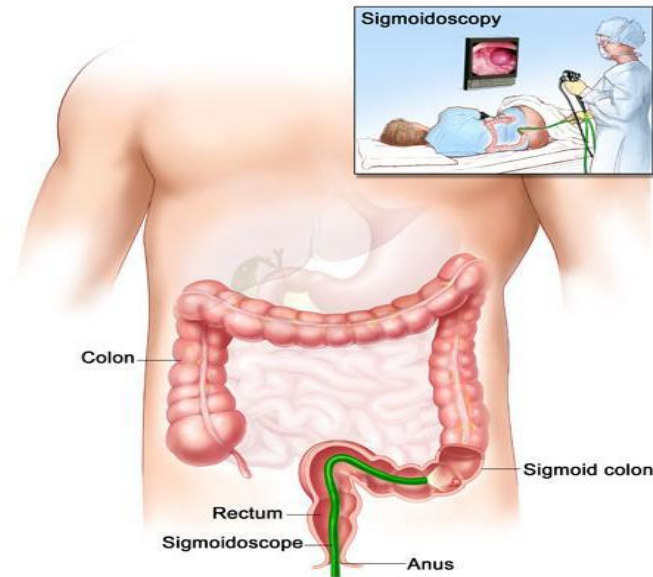

Have you ever heard of a flexible sigmoidoscopy?    \_\_\_ Yes    \_\_\_ No    \_\_\_ Don't know/Not sure

If yes, please go to the next page (page 9) of the survey.

If no or don't know/not sure, please skip to page 10 of the survey.



*[If you have never heard of a Sigmoidoscopy, please SKIP to page 10 of the survey.]*

**Have you ever had a flexible sigmoidoscopy?** \_\_\_\_\_ Yes \_\_\_\_\_ No \_\_\_\_\_ Don't know/Not sure

**If yes, how long has it been since you had your last sigmoidoscopy?**

- \_\_\_\_\_ Within the past year (12 months ago or less)
- \_\_\_\_\_ Between 1 and 2 years ago (more than 12 months but less than 24 months ago)
- \_\_\_\_\_ Between 2 and 3 years ago (more than 24 months but less than 36 months ago)
- \_\_\_\_\_ Between 3 and 5 years ago (more than 36 months but less than 60 months ago)
- \_\_\_\_\_ Between 5 and 10 years ago
- \_\_\_\_\_ More than 10 years ago
- \_\_\_\_\_ Never
- \_\_\_\_\_ Don't know/Not sure

**Has a health care provider recommended that you have a sigmoidoscopy this year to check your bowel for cancer?**

\_\_\_\_\_ Yes \_\_\_\_\_ No \_\_\_\_\_ Don't know/don't remember

**We would like to ask you about a test called Colonoscopy:**

A colonoscopy is an exam in which a tube is inserted in the rectum to examine the bowel for signs of cancer or other health problems. During the colonoscopy you are given medicine **to put you to sleep.**

## Colonoscopy

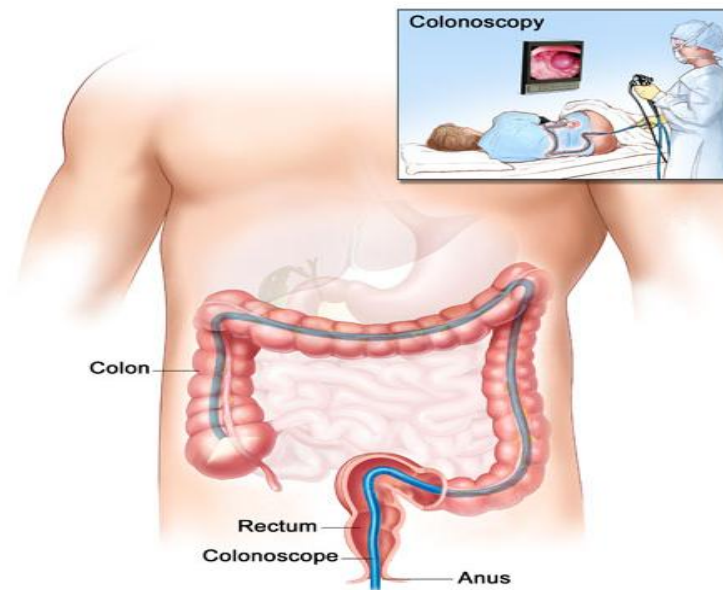

Have you ever heard of a colonoscopy?    \_\_\_ Yes    \_\_\_ No    \_\_\_ Don't know/Not sure

If yes, please go to the next page (page 11) of the survey.

If no or don't know/not sure, please skip to page 13 of the survey.

*[If you have never heard of a Colonoscopy, please SKIP to page 13 of the survey.]*

**Have you ever had a colonoscopy?**     Yes     No     Don't know/Not sure

**If yes, how long has it been since you had your last colonoscopy?**

- Within the past year (12 months ago or less)
- Between 1 and 2 years ago (more than 12 months but less than 24 months ago)
- Between 2 and 3 years ago (more than 24 months but less than 36 months ago)
- Between 3 and 5 years ago (more than 36 months but less than 60 months ago)
- Between 5 and 10 years ago
- More than 10 years ago
- Never
- Don't know/Not sure

**Has a health care provider recommended that you have a colonoscopy this year to check your bowel for cancer?**

Yes     No     Don't know/Don't remember

| <b>Do you agree with the following statements?</b>                                             | <b>Disagree</b> | <b>Agree</b> | <b>Not Sure</b> |
|------------------------------------------------------------------------------------------------|-----------------|--------------|-----------------|
| A colonoscopy will help find colorectal cancer early.                                          |                 |              |                 |
| A colonoscopy will decrease your chances of dying from colorectal cancer.                      |                 |              |                 |
| A colonoscopy will help you not worry as much about colorectal cancer.                         |                 |              |                 |
| I am afraid to have a colonoscopy because I might find out something is wrong.                 |                 |              |                 |
| A colonoscopy is embarrassing.                                                                 |                 |              |                 |
| I do not have time to do a colonoscopy.                                                        |                 |              |                 |
| The cost would keep me from having a colonoscopy.                                              |                 |              |                 |
| I feel anxious about having a colonoscopy because I don't really understand what will be done. |                 |              |                 |
| Having a colonoscopy is painful.                                                               |                 |              |                 |

| <b>Do you agree with the following statements?</b>                                                          | <b>Disagree</b> | <b>Agree</b> | <b>Not Sure</b> |
|-------------------------------------------------------------------------------------------------------------|-----------------|--------------|-----------------|
| Having to follow a special diet and take a laxative or enema would keep me from having a colonoscopy.       |                 |              |                 |
| I am afraid to have a colonoscopy because of the possibility there may be bleeding or tearing of the colon. |                 |              |                 |
| Having a colonoscopy might mean that a person is gay or bisexual.                                           |                 |              |                 |
| I would have trouble having a colonoscopy because I do not have health insurance.                           |                 |              |                 |

**These next few questions are about breast cancer:**

A mammogram is an x-ray picture of the breast. When you get a mammogram, your breast is placed between two plastic plates and pressed while the x-ray picture is taken.

When did you have your last mammogram?

- Within the past 12 months
- More than 12 months ago
- I've never had a mammogram

*Different women have different ideas about getting a mammogram.  
Tell us what you think.*

|                                                                     | <b>Yes</b> | <b>No</b> | <b>Not Sure</b> |
|---------------------------------------------------------------------|------------|-----------|-----------------|
| Are you too busy to get a mammogram?                                | ___        | ___       | ___             |
| Would having a mammogram be too painful for you?                    | ___        | ___       | ___             |
| Do you have a way to get to the mammogram place?                    | ___        | ___       | ___             |
| Can having a mammogram actually cause breast cancer?                | ___        | ___       | ___             |
| Would having a mammogram be too embarrassing for you?               | ___        | ___       | ___             |
| Is the mammogram place open when you have time to go?               | ___        | ___       | ___             |
| Would the cost of a mammogram be a problem for you now?             | ___        | ___       | ___             |
| Would having a mammogram make you worry about having breast cancer? | ___        | ___       | ___             |

*Tell us what you think a mammogram can do.*

|                                                                    | <b>Yes</b> | <b>No</b> | <b>Not Sure</b> |
|--------------------------------------------------------------------|------------|-----------|-----------------|
| Do mammograms find all breast cancers?                             | ___        | ___       | ___             |
| Do you need a mammogram if your breasts feel fine?                 | ___        | ___       | ___             |
| Can having a mammogram help set your mind at ease?                 | ___        | ___       | ___             |
| Can a mammogram reduce your risk of dying from breast cancer?      | ___        | ___       | ___             |
| Can a mammogram find a breast lump before it's big enough to feel? | ___        | ___       | ___             |

*Tell us what you think about breast cancer.*

|                                                                          | <b>Yes</b> | <b>No</b> | <b>Not Sure</b> |
|--------------------------------------------------------------------------|------------|-----------|-----------------|
| Do most breast lumps turn out to be cancer?                              | ___        | ___       | ___             |
| Can bumping or bruising the breasts lead to breast cancer?               | ___        | ___       | ___             |
| Can touching, rubbing, or squeezing the breasts lead to breast cancer?   | ___        | ___       | ___             |
| Are older women more likely to get breast cancer than younger women?     | ___        | ___       | ___             |
| Are Black women more likely to die from breast cancer than White women?  | ___        | ___       | ___             |
| If a breast lump isn't bothering you, is it best just to leave it alone? | ___        | ___       | ___             |

*Tell us what you think about breast cancer treatment.*

|                                                                           | <b>Yes</b> | <b>No</b> | <b>Not Sure</b> |
|---------------------------------------------------------------------------|------------|-----------|-----------------|
| Can breast cancer be treated without removing the breast?                 | ___        | ___       | ___             |
| Is the treatment for breast cancer worse than the cancer itself?          | ___        | ___       | ___             |
| Does breast cancer that is found early have a good chance of being cured? | ___        | ___       | ___             |

*Would you say your chances of getting breast cancer in the next 10 years are:*

- \_\_\_ Higher than other Black women your age
- \_\_\_ About the same as other Black women your age
- \_\_\_ Lower than other Black women your age

Do you have any **other comments** about Project HEAL that you have not already mentioned?

---



---



---

**We want to thank you very much for your participation!**
