# Supplementary material for: Dimensions of sustainability for a health communication intervention in African American churches: a multi-methods study
Source: PubMed Central journal article supplement (PMC5371253; doi:10.1186/s13012-017-0576-x), 2017-03-28
Supplement: 13012_2017_576_MOESM5_ESM.pdf [file 13012_2017_576_MOESM5_ESM.pdf]

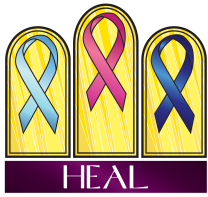

# Project HEAL

*Health through Early Awareness and Learning*

## CHA Interview Guide

*Thank you for meeting with me/us today! We are interested in learning about any new activities in your church having to do with health and wellness. Your responses will help inform how we can best partner together on future church-based health activities. There are no right or wrong answers to these questions. Are you ready to begin?*

### **Project HEAL Sustainability**

Have there been any more cancer-related workshops conducted at your church since the 3 Project HEAL workshops?  No     Yes     Not Sure

If yes, please let me know the number of workshops and estimated number of attendees for the following topics:

|                    |                           |                           |
|--------------------|---------------------------|---------------------------|
| Breast Cancer:     | _____ number of workshops | _____ number of attendees |
| Prostate Cancer:   | _____ number of workshops | _____ number of attendees |
| Colorectal Cancer: | _____ number of workshops | _____ number of attendees |
| Cancer Overview:   | _____ number of workshops | _____ number of attendees |
| Local Resources:   | _____ number of workshops | _____ number of attendees |
| Other cancer:      | _____ number of workshops | _____ number of attendees |

Cancer type covered: \_\_\_\_\_

If yes, who conducted the workshops?

CHA             2<sup>nd</sup> CHA  
 Pastor(s)     Other person(s) (role in the church?) \_\_\_\_\_

If yes, did you use the original HEAL materials, did you modify the HEAL materials, or did you find new materials from somewhere else?

HEAL             Modified HEAL             New materials from somewhere else

If modified or new materials, please describe:

\_\_\_\_\_

\_\_\_\_\_

\_\_\_\_\_

Have there been any other health-related activities sponsored by your church since the 3 Project HEAL workshops (e.g., health fairs or groups)?  No  Yes  Not Sure

If yes, what kind of activities? Answer choices are *(please check all that apply)*:

- Classes/group sessions
- Counseling
- Brochures distributed (e.g., pamphlets, booklets)
- Meetings about health
- Organized health fair(s)
- Participated in health fair(s)
- Walking or exercise group
- Health promoting activities/messages in children's programs (such as Sunday school)
- Testing/Screening

If yes, what kind: \_\_\_\_\_

Other: \_\_\_\_\_

If yes, who conducted the activities *(please check all that apply)*?

- CHA
- 2<sup>nd</sup> CHA
- Pastor(s)
- Other person(s) (role in the church?) \_\_\_\_\_

If yes, can you tell me a little more about these activities?

*(Interviewer notes/probes: How often? How many participates? Did you partner with other groups?)*

---



---

If yes, do you think these would have happened without your participation in Project HEAL?  No  Yes  Not sure

Why or why not?

---



---

What health topics have been covered since the 3 Project HEAL workshops *(Please check all that apply)*

- Heart disease (including high blood pressure)
- Asthma
- Stroke
- Aging
- Cancer
- Obesity/Overweight
- Breast
- HIV/AIDS
- Prostate
- Children's Health
- Colorectal
- Weight Loss
- Diabetes
- Stress Reduction
- Physical Activity
- Walking
- Healthy Diet
- Smoking
- Other: \_\_\_\_\_

Has there been a health ministry or health committee that has formed since Project HEAL began?     No     Yes     Not Sure

If yes:

What is the name of the ministry: \_\_\_\_\_

When was your health ministry formed: \_\_\_\_\_

Who leads the health ministry? \_\_\_\_\_

*(Interviewer probes: Led by pastor or CHA? Paid or volunteer?)*

What is the current meeting schedule?: \_\_\_\_\_

What resources are available to the ministry?: \_\_\_\_\_

If not:

Does your church conduct health activities?     No     Yes     Not Sure

Are you interested in establishing a health ministry?     No     Yes

What future plans do you suggest for your health ministry?

---

---

---

Have there been any additional resources obtained for health activities like space, funds, or equipment?  No  Yes  Not Sure

If yes, what type of resources: \_\_\_\_\_

Does your church have a formal church wellness policy?  No  Yes  Not Sure

Have there been any changes in church policy that involve health (e.g., healthier meals at church functions, no-smoking zones, etc.?)  No  Yes  Not Sure

If yes, please describe:

\_\_\_\_\_  
\_\_\_\_\_  
\_\_\_\_\_

Has your church asked for OR received additional technical assistance in health promotion or health education (not including Project HEAL)?  No  Yes  Not Sure

If yes, please describe:

\_\_\_\_\_  
\_\_\_\_\_  
\_\_\_\_\_

Have you (personally) received further continuing education about cancer?  No  Yes

If yes, please describe:

\_\_\_\_\_  
\_\_\_\_\_  
\_\_\_\_\_

From where did you learn? \_\_\_\_\_

How long did it take you? \_\_\_\_\_

Have you personally learned or attempted to learn any additional health-related information since your Community Health Advisor training?  No  Yes

If so, on what health topic(s) did you learn more (*Please list all*)?

\_\_\_\_\_  
\_\_\_\_\_  
\_\_\_\_\_

From where did you learn? \_\_\_\_\_

How long did it take you? \_\_\_\_\_

Were there any outcomes from Project HEAL that were not initially planned (things that happened as a result of Project HEAL)?  No  Yes  Not Sure

If yes, please describe:

---

---

---

Have any other churches, organizations, or individuals contacted your church for information about Project HEAL or other health activities?  No  Yes  Not Sure

If yes, who has contacted your church?:

Other churches

If yes, number of partners \_\_\_\_\_

Health organizations (e.g., hospitals, health centers, etc.)

If yes, number of partners \_\_\_\_\_

Universities or colleges

If yes, number of partners \_\_\_\_\_

Other: \_\_\_\_\_

To your knowledge, has your church participated in any other research projects since the Project HEAL workshops:  No  Yes  Not Sure

(If yes, describe the project(s) and your partner(s)) [Does NOT include Project HEAL]

---

---

---

**Pastor’s Participation in Project HEAL**

What actions did the pastor or church leadership take in promoting the HEAL workshops?

Answer choices are: *(please check all that apply)*

- Mentioned workshops in sermon
  - Announced workshops during announcements
  - Included workshop announcements in church bulletins
  - Invited members to attend
  - Attended the workshops
  - None
  - Other: (please describe)
- 

How many workshops did Pastor attend?      0     1     2     3     Cannot recall

How would you rate Pastor’s level of enthusiasm about the Project HEAL workshops?

          1           2           3           4           5  
Not enthusiastic                                                  Very enthusiastic

How long has the lead pastor been in place in your church? \_\_\_\_\_

**Other Clergy or Lay Health Ministry Leader Participation in Project HEAL**

Were there other clergy or lay health ministry leaders (other than self/other CHA) involved in Project HEAL from your church?     No     Yes

If yes, what actions did the other clergy or lay health ministry leader take in promoting the HEAL workshops? Answer choices are: *(please check all that apply)*

- Mentioned workshops in sermon
  - Announced workshops during announcements
  - Invited members to attend
  - Announced workshops during ministry meetings
  - Attended the workshops
  - None
  - Other: (please describe)
- 

How many workshops did other clergy or lay health ministry leaders attend?

- 0     1     2     3     Cannot recall

If other clergy or lay health ministry leaders attended, how enthusiastic were they about the Project HEAL workshop?

1 2 3 4 5  
Not enthusiastic Very enthusiastic

**Community Health Advisor Insights**

In your opinion, what was the most positive aspect of your volunteer work with Project HEAL?

---

---

---

Was there anything about your work with Project HEAL that you did not like, or that did not work well?

---

---

---

Looking back, would you have done anything differently about your volunteer work with Project HEAL?

---

---

---

Would you like to add any more comments on your experience as a Community Health Advisor with Project HEAL?

---

---

---

***Thank you for your time and for participating in Project HEAL.***
