# Supplementary material for: Dimensions of sustainability for a health communication intervention in African American churches: a multi-methods study
Source: Springer Nature journal article supplement (doi:10.1186/s13012-017-0576-x), 2017-03-28
Supplement: MOESM6 [file 12183114]

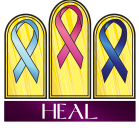

# Project HEAL

*Health through Early Awareness and Learning*

---

Please tell us about any new health/wellness activities in your church ***in the last 12 months***.

1. Have there been any more cancer-related workshops conducted at your church ***in the last 12 months***?       No     Yes     Not Sure

If yes, cancer type covered: \_\_\_\_\_

2. Have there been any other health-related activities sponsored by your church ***in the last 12 months*** (e.g., health fairs or groups)?       No     Yes     Not Sure

If yes, what kind of activities? Answer choices are (*please check all that apply*):

- |                                                                                                              |                                                         |
|--------------------------------------------------------------------------------------------------------------|---------------------------------------------------------|
| <input type="checkbox"/> Classes/group sessions                                                              | <input type="checkbox"/> Counseling                     |
| <input type="checkbox"/> Brochures distributed (e.g., pamphlets, booklets)                                   | <input type="checkbox"/> Meetings about health          |
| <input type="checkbox"/> Organized health fair(s)                                                            | <input type="checkbox"/> Participated in health fair(s) |
| <input type="checkbox"/> Walking or exercise group                                                           |                                                         |
| <input type="checkbox"/> Health promoting activities/messages in children's programs (such as Sunday school) |                                                         |
| <input type="checkbox"/> Testing/Screening                                                                   |                                                         |
| <input type="checkbox"/> Other: _____                                                                        |                                                         |

3. What health topics have been covered ***in the last 12 months*** (*Please check all that apply*)

- |                                                                        |                                             |
|------------------------------------------------------------------------|---------------------------------------------|
| <input type="checkbox"/> Heart disease (including high blood pressure) | <input type="checkbox"/> Asthma             |
| <input type="checkbox"/> Stroke                                        | <input type="checkbox"/> Aging              |
| <input type="checkbox"/> Cancer                                        | <input type="checkbox"/> Obesity/Overweight |
| <input type="checkbox"/> Breast                                        | <input type="checkbox"/> HIV/AIDS           |
| <input type="checkbox"/> Prostate                                      | <input type="checkbox"/> Children's Health  |
| <input type="checkbox"/> Colorectal                                    | <input type="checkbox"/> Weight Loss        |
| <input type="checkbox"/> Diabetes                                      | <input type="checkbox"/> Stress Reduction   |
| <input type="checkbox"/> Physical Activity                             | <input type="checkbox"/> Walking            |
| <input type="checkbox"/> Healthy Diet                                  | <input type="checkbox"/> Smoking            |
| <input type="checkbox"/> Other: _____                                  |                                             |

4. Has there been a health ministry or health committee that has formed ***in the last 12 months***?       No     Yes     Not Sure

5. Has your church put in place a formal church wellness policy ***in the last 12 months***?

No     Yes     Not Sure

6. Would you like to add any more comments on your experience as a Community Health Advisor with Project HEAL? (Use the back of this sheet for more space)

---
